# Supplementary material for: Plasticity of Adult Human Pancreatic Duct Cells by Neurogenin3-Mediated Reprogramming
Source: PubMed Central journal article supplement (PMC3351393; doi:10.1371/journal.pone.0037055), 2012-05-14
Supplement: pone.0037055.s003.pdf [file pone.0037055.s003.pdf]

**Table S1: transcripts induced by Ad-GFP-Ngn3 in human pancreatic duct cells**

| Gene Symbol                             | Accession | Gene name                                                                  | Ngn3/Control |        | Ngn3<br>D14/D3 | ARRAY<br>HG133 | Probe set<br>ID | endocrine<br>abundance | Cluster<br>Fig. 2 |
|-----------------------------------------|-----------|----------------------------------------------------------------------------|--------------|--------|----------------|----------------|-----------------|------------------------|-------------------|
|                                         |           |                                                                            | D3           | D14    |                |                |                 |                        |                   |
| <b>Development - Neurogenesis</b>       |           |                                                                            |              |        |                |                |                 |                        |                   |
| <i>NEUROG3</i>                          | NM_020999 | neurogenin 3                                                               | 1.7          | 12.5 * | 5.94 *         | A              | 207965_at       | 0.7                    | B                 |
| <i>NEUROG1</i>                          | NM_006161 | neurogenin 1                                                               | 2.7 *        | 1.1    | -2.2           | A              | 208497_x_at     | 0.5                    | B                 |
| <i>NEUROD1</i>                          | NM_002500 | neurogenic differentiation 1                                               | 4.2 *        | 30.9 * | 12.5 *         | A              | 206282_at       | 21.0                   | B                 |
| <i>PAX4</i>                             | AB008913  | paired box gene 4                                                          | 1.5          | 2.4 *  | 2.01 *         | A              | 211176_s_at     | 1.0                    | B                 |
| <i>PAX6</i>                             | AW088232  | paired box gene 6 (aniridia, keratitis)                                    | 1.2          | 5.3 *  | 5.22 *         | B              | 235795_at       | -                      | -                 |
| <i>NKX2-2</i>                           | NM_002509 | NK2 transcription factor related, locus 2 (Drosophila)                     | 5.4 *        | 23.3 * | 6.32 *         | A              | 206915_at       | 19.9                   | A                 |
| <i>Asc11</i>                            | BC001638  | achaete-scute complex-like 1 (Drosophila)                                  | 1.1          | 48.9 * | 54.9 *         | A              | 209988_s_at     | 4.4                    | A                 |
| <i>FOXA2</i>                            | AL121722  | hepatocyte nuclear factor 3, beta                                          | 2.4 *        | 2.6 *  | -1.3           | B              | 228004_at       | -                      | -                 |
| <i>EYA2</i>                             | U71207    | eyes absent homolog 2 (Drosophila)                                         | 2.5          | 2.8 *  | 1.79           | A              | 209692_at       | 0.6                    | MISC              |
| <i>STMN2</i>                            | BF967657  | stathmin-like 2                                                            | 1.5          | 5.5 *  | 7.35 *         | A              | 203000_at       | 10.8                   | C                 |
| <i>NPTX1</i>                            | NM_002522 | neuronal pentraxin I                                                       | 45.3 *       | 64.1   | 1.33           | A              | 204684_at       | 0.9                    | C                 |
| <i>INSM1</i>                            | NM_002196 | insulinoma-associated 1                                                    | 64.7 *       | 82.4 * | 3.29 *         | A              | 206502_s_at     | 25.3                   | A                 |
| <i>ISL1</i>                             | NM_002202 | ISL1 transcription factor, LIM/homeodomain, (islet-1)                      | 1.2          | 2.4 *  | 2.42 *         | A              | 206104_at       | 26.9                   | A                 |
| <i>NHLH1</i>                            | M96739    | nescient helix loop helix 1                                                | 1.2          | 2.3 *  | 1.85           | A              | 214628_at       | 0.6                    | B                 |
| <i>NHLH2</i>                            | AA166895  | nescient helix loop helix 2                                                | 1.6          | 4.3 *  | 3 *            | A              | 215228_at       | 0.5                    | B                 |
| <i>NLGN1</i>                            | NM_014932 | neuroligin 1                                                               | -1.5         | 1.0    | 2.09 *         | A              | 205893_at       | 1.4                    | B                 |
| <i>PCP4</i>                             | NM_006198 | Purkinje cell protein 4                                                    | 2.1          | 4.7 *  | 3.4 *          | A              | 205549_at       | 5.9                    | C                 |
| <i>S100A1</i>                           | NM_006271 | S100 calcium binding protein A1                                            | 5.4 *        | 9.2 *  | 2              | A              | 205334_at       | 0.5                    | C                 |
| <i>SIMI</i>                             | AL121948  | single-minded homolog 1 (Drosophila)                                       | 1.2          | 1.4    | 1.96 *         | A              | 206876_at       | 1.2                    | B                 |
| <i>SERPINI1</i>                         | NM_005025 | serine (or cysteine) proteinase inhibitor, clade I (neuroserpin), member 1 | 2.0          | 2.6 *  | -1.2           | A              | 205352_at       | 2.1                    | C                 |
| <i>OLFML2B</i>                          | AW007573  | olfactomedin-like 2B                                                       | 3.6 *        | 2.0    | -1.5           | A              | 213125_at       | 0.7                    | B                 |
| <i>AF1Q</i>                             | BC006471  | ALL1-fused gene from chromosome 1q                                         | 1.0          | 1.4    | 1.86 *         | A              | 211071_s_at     | 1.2                    | C                 |
| <i>PHC2</i>                             | AA431100  | polyhomeotic-like 2 (Drosophila)                                           | -1.2         | 1.2    | 2 *            | B              | 238131_at       | -                      | -                 |
| <i>MT3</i>                              | NM_005954 | metallothionein 3 (growth inhibitory factor (neurotrophic))                | 2.1 *        | 1.2    | -1.6           | A              | 205970_at       | 0.6                    | C                 |
| <i>APBA2</i>                            | AW571582  | amyloid beta (A4) precursor protein-binding, family A, member 2 (X11)      | 2.0          | 3.5 *  | 1.05           | A              | 209870_s_at     | 0.9                    | MISC              |
| <i>APLP1</i>                            | U48437    | amyloid beta (A4) precursor-like protein 1                                 | 1.6          | 3.5    | 5.81 *         | A              | 209462_at       | 5.8                    | C                 |
| <i>BACE1</i>                            | NM_012104 | beta-site APP-cleaving enzyme 1                                            | 1.2          | 1.9 *  | 1.54           | A              | 217904_s_at     | 2.0                    | A                 |
| <i>TM4SF2</i>                           | NM_004615 | tetraspanin 7/transmembrane 4 superfamily member 2                         | 1.3          | 2.5 *  | 2.67 *         | A              | 202242_at       | 5.0                    | C                 |
| <i>TM4SF9</i>                           | AF065389  | tetraspanin 5/transmembrane 4 superfamily member 9                         | 1.2          | 3.0 *  | 2.12 *         | A              | 209890_at       | 1.2                    | MISC              |
| <i>GDAP1</i>                            | BF002104  | ganglioside-induced differentiation-associated protein 1                   | 1.2          | 2.9 *  | 1.95           | B              | 226269_at       | -                      | -                 |
| <b>Wnt-Notch and Nodal signaling</b>    |           |                                                                            |              |        |                |                |                 |                        |                   |
| <i>DLL1</i>                             | AF196571  | delta-like 1 (Drosophila)                                                  | 3.7 *        | 1.9    | -1.4           | B              | 224215_s_at     | -                      | -                 |
| <i>HES6</i>                             | AW249678  | hairy and enhancer of split 6 (Drosophila)                                 | 5.2          | 16.1 * | 1.91           | B              | 226446_at       | -                      | -                 |
| <i>LFNG</i>                             | AW151924  | lunatic fringe homolog (Drosophila)                                        | 5.4 *        | 7.9 *  | -1.2           | B              | 228762_at       | -                      | -                 |
| <i>SOSTDC1</i>                          | AI927000  | sclerostin domain containing 1                                             | 2.2 *        | 45.9   | -2.4           | A              | 213456_at       | 1.1                    | MISC              |
| <i>NOMO2</i>                            | N39536    | NODAL modulator 2 ( Hypothetical protein LOC283820)                        | 41.2 *       | -1.6   | -1.6           | A              | 221852_at       | 0.8                    | MISC              |
| <i>TGFB1</i>                            | NM_000660 | transforming growth factor, beta 1 (Camurati-Engelmann disease)            | 8.2 *        | 4.7    | -2.3           | A              | 203084_at       | 0.4                    | B                 |
| <b>Neuroendocrine-Synaptic Function</b> |           |                                                                            |              |        |                |                |                 |                        |                   |

|                                |           |                                                                      |      |      |      |      |      |   |             |           |      |      |
|--------------------------------|-----------|----------------------------------------------------------------------|------|------|------|------|------|---|-------------|-----------|------|------|
| <i>CPE</i>                     | NM_001873 | carboxypeptidase E                                                   | 1.7  | 3.0  | *    | 2.16 | *    | A | 201117_s_at | 29.2      | A    |      |
| <i>RTN2</i>                    | NM_005619 | reticulon 2                                                          | 7.9  | *    | 13.4 | -1.8 |      | A | 204217_s_at | 0.7       | B    |      |
| <i>CADPS</i>                   | NM_003716 | Ca <sup>2+</sup> -dependent secretion activator                      | 1.4  | 2.4  | *    | 1.45 |      | A | 204814_at   | 6.2       | B    |      |
| <i>ENPP2</i>                   | L35594    | ectonucleotide pyrophosphatase/phosphodiesterase 2 (autotaxin)       | 1.6  | 5.3  | *    | 3.83 | *    | A | 209392_at   | 13.0      | A    |      |
| <i>PCSK1</i>                   | NM_000439 | proprotein convertase subtilisin/kexin type 1                        | 1.4  | 19.7 | *    | 15.9 | *    | A | 205825_at   | 17.3      | A    |      |
| <i>PCSK2</i>                   | NM_002594 | proprotein convertase subtilisin/kexin type 2                        | 1.8  | 2.4  |      | 3.27 | *    | A | 204870_s_at | 15.4      | A    |      |
| <i>RET</i>                     | M31213    | ret proto-oncogene                                                   | 4.1  | *    | 2.4  | -3.3 |      | A | 211421_s_at | 1.3       | MISC |      |
| <i>SST</i>                     | NM_001048 | somatostatin                                                         | -1.1 | 2.5  |      | 5.77 | *    | A | 213921_at   | 28.4      | A    |      |
| <i>TAC3</i>                    | NM_013251 | tachykinin 3 (neuromedin K, neurokinin beta)                         | 1.2  | 34.0 | *    | 21.7 | *    | A | 219992_at   | 0.8       | MISC |      |
| <i>ECEL1</i>                   | NM_004826 | endothelin converting enzyme-like 1                                  | -1.0 | 2.0  |      | 2.76 | *    | A | 219914_at   | 1.6       | MISC |      |
| <i>CABP7</i>                   | A1989906  | calcium binding protein 7                                            | 4.1  | *    | 18.1 | *    | 3.12 | * | B           | 243173_at | -    | -    |
| <i>CAMK2B</i>                  | AF078803  | calcium/calmodulin-dependent protein kinase (CaM kinase) II beta     | 1.2  | 2.4  | *    | 2.12 | *    | A | 210404_x_at | 1.1       | C    |      |
| <i>CHGA</i>                    | NM_001275 | chromogranin A (parathyroid secretory protein 1)                     | 1.4  | 10.4 | *    | 12.2 | *    | A | 204697_s_at | 14.2      | A    |      |
| <i>CHGB</i>                    | NM_001819 | chromogranin B (secretogranin 1)                                     | 1.5  | 2.7  | *    | 3.13 | *    | A | 204260_at   | 27.0      | A    |      |
| <i>CPLX1</i>                   | BC002471  | complexin 1                                                          | 3.7  | *    | 3.5  | *    | 1.11 |   | B           | 223500_at | -    | -    |
| <i>CPNE5</i>                   | AB046819  | copine V                                                             | -3.2 | -1.3 |      | 2.62 | *    | B | 227189_at   | -         | -    |      |
| <i>EFHD2</i>                   | NM_024329 | EF hand domain containing 2                                          | 1.2  | 2.3  | *    | 1.23 |      | A | 217992_s_at | 0.6       | MISC |      |
| <i>HPCA</i>                    | BC001777  | hippocalcin                                                          | 8.1  | 8.8  | *    | 7.19 | *    | A | 205454_at   | 0.6       | B    |      |
| <i>NBEA</i>                    | NM_015678 | neurobeachin                                                         | 1.1  | 2.1  | *    | 1.73 |      | A | 221207_s_at | 1.4       | B    |      |
| <i>KCNF1</i>                   | AF029780  | potassium voltage-gated channel, subfamily F, member 1               | 6.1  | 6.4  | *    | 1.19 |      | A | 210263_at   | 0.8       | C    |      |
| <i>KCNH2</i>                   | NM_000238 | potassium voltage-gated channel, subfamily H (eag-related), member 2 | -1.0 | 2.4  | *    | 2.21 |      | A | 205262_at   | 4.0       | A    |      |
| <i>RAB26</i>                   | NM_014353 | RAB26, member RAS oncogene family                                    | 3.6  | *    | 8.4  | *    | 2.55 |   | A           | 219562_at | 1.0  | B    |
| <i>RPIP8</i>                   | AI197870  | RaP2 interacting protein 8                                           | -1.0 | 1.5  |      | 1.82 | *    | A | 213439_x_at | 1.2       | C    |      |
| <i>SCGN</i>                    | NM_006998 | secretagoin, EF-hand calcium binding protein                         | 3.2  | 23.8 | *    | 7.59 | *    | A | 205697_at   | 9.8       | A    |      |
| <i>SCG2</i>                    | NM_003469 | secretogranin II (chromogranin C)                                    | 1.3  | 6.9  | *    | 6.46 | *    | A | 204035_at   | 31.1      | A    |      |
| <i>SCG3</i>                    | NM_013243 | secretogranin III                                                    | 3.9  | 7.5  | *    | 5.12 | *    | A | 219196_at   | 55.6      | A    |      |
| <i>SGNE1</i>                   | NM_003020 | secretory granule, neuroendocrine protein 1 (7B2 protein)            | 1.1  | 2.8  | *    | 2.91 | *    | A | 203889_at   | 62.5      | A    |      |
| <i>SCN1B</i>                   | NM_001037 | sodium channel, voltage-gated, type I, beta                          | 1.5  | 2.5  | *    | 1.94 | *    | A | 205508_at   | 2.4       | C    |      |
| <i>SV2A</i>                    | NM_014849 | synaptic vesicle glycoprotein 2A                                     | 1.1  | 1.9  |      | 2.43 | *    | A | 203069_at   | 1.6       | C    |      |
| <i>SYNGR3</i>                  | NM_004209 | synaptogyrin 3                                                       | -1.4 | 1.1  |      | 1.92 | *    | A | 205691_at   | 1.2       | C    |      |
| <i>SYP</i>                     | U93305    | synaptophysin                                                        | 1.1  | 3.6  | *    | 2.76 | *    | A | 213200_at   | 1.4       | C    |      |
| <i>SNAP25</i>                  | NM_003081 | synaptosomal-associated protein, 25kDa                               | -1.0 | 1.7  |      | 3.33 | *    | A | 202508_s_at | 14.3      | C    |      |
| <i>SYT4</i>                    | AB037763  | synaptotagmin IV                                                     | 1.0  | 2.8  | *    | 2.22 | *    | B | 223529_at   | -         | -    |      |
| <i>SYT11</i>                   | AA626780  | synaptotagmin XI                                                     | 1.1  | 1.6  |      | 2.09 | *    | A | 209197_at   | 1.6       | C    |      |
| <i>SYT13</i>                   | AB037848  | synaptotagmin XIII                                                   | 1.1  | 2.1  | *    | 1.74 |      | B | 226086_at   | -         | -    |      |
| <b>Intracellular Signaling</b> |           |                                                                      |      |      |      |      |      |   |             |           |      |      |
| <i>PPP1R1A</i>                 | NM_006741 | protein phosphatase 1, regulatory (inhibitor) subunit 1A             | -1.2 | -1.1 |      | 1.93 | *    | A | 205478_at   | 18.9      | A    |      |
| <i>PPP1R3C</i>                 | N26005    | protein phosphatase 1, regulatory (inhibitor) subunit 3C             | 2.8  | *    | 2.5  | *    | 1.41 |   | A           | 204284_at | 1.1  | MISC |
| <i>HSPDGFB</i>                 | X63966    | H.sapiens synthetic gene for platelet-derived growth factor-BB.      | 4.0  | *    | 79.2 | -1.8 |      | A | 217108_at   | 0.9       | MISC |      |
| <i>IGFBPL1</i>                 | AL522781  | insulin-like growth factor binding protein-like 1                    | 2.4  | *    | 8.1  | *    | 3.27 | * | B           | 227760_at | -    | -    |
| <i>ADCY2</i>                   | AU149572  | adenylate cyclase 2 (brain)                                          | 1.1  | 2.8  | *    | 3.62 | *    | A | 213217_at   | 1.2       | C    |      |
| <i>ADRA1A</i>                  | D32202    | adrenergic, alpha-1A-, receptor                                      | 15.2 | *    | 4.7  | -3.3 |      | A | 211491_at   | 0.5       | B    |      |
| <i>GNAS</i>                    | AA401492  | GNAS complex locus                                                   | 1.9  | 5.0  | *    | 2.1  | *    | A | 214157_at   | 9.5       | A    |      |
| <i>HRH1</i>                    | NM_000861 | histamine receptor H1                                                | 3.3  | *    | 4.6  | 1    |      | A | 205579_at   | 0.4       | B    |      |

|                 |           |                                                                      |       |        |        |   |             |     |      |
|-----------------|-----------|----------------------------------------------------------------------|-------|--------|--------|---|-------------|-----|------|
| <i>GNG2</i>     | AK026424  | guanine nucleotide binding protein (G protein), gamma 2              | 1.2   | 10.5 * | 9.75 * | B | 224964_s_at | -   | -    |
| <i>SSTR2</i>    | BC000256  | somatostatin receptor 2                                              | 2.1   | 4.9 *  | 2.54 * | A | 214597_at   | 0.4 | B    |
| <i>RAPGEFL1</i> | NM_016339 | Rap guanine nucleotide exchange factor (GEF)-like 1                  | 1.8   | 2.4 *  | 1.25   | A | 218657_at   | 0.9 | MISC |
| <i>RASGRP1</i>  | NM_005739 | RAS guanyl releasing protein 1 (calcium and DAG-regulated)           | 1.4   | 2.1 *  | 1.77   | A | 205590_at   | 3.1 | MISC |
| <i>RRAD</i>     | NM_004165 | Ras-related associated with diabetes                                 | 4.0 * | 1.0    | -4.3   | A | 204802_at   | -   | A    |
| <i>MAP3K4</i>   | AI633559  | mitogen-activated protein kinase kinase kinase 4                     | 1.5   | 4.5 *  | 1.7    | B | 238623_at   | -   | -    |
| <i>PLCXD3</i>   | AL133721  | phosphatidylinositol-specific phospholipase C, X domain containing 3 | -1.9  | 5.8 *  | 5.17   | B | 239270_at   | -   | -    |
| <i>PRKCE</i>    | AI247134  | Protein kinase C, epsilon -grade E annotation                        | 3.0 * | 1.3    | -2.5   | B | 239011_at   | -   | -    |
| <i>TNK2</i>     | BE676245  | activated p21cdc42Hs kinase                                          | 4.8 * | 1.8    | -2.5   | B | 228279_s_at | -   | -    |
| <i>TIAM1</i>    | U90902    | T-cell lymphoma invasion and metastasis 1                            | -1.2  | 1.5    | 2.03 * | A | 213135_at   | 2.5 | A    |

#### Nuclear - Transcription

|                 |           |                                                                            |       |        |        |   |             |      |      |
|-----------------|-----------|----------------------------------------------------------------------------|-------|--------|--------|---|-------------|------|------|
| <i>CUL3</i>     | NM_003590 | cullin 3                                                                   | 1.0   | 7.3 *  | 6.87 * | A | 201372_s_at | 3.6  | A    |
| <i>CDKN1C</i>   | R78668    | cyclin-dependent kinase inhibitor 1C (p57, Kip2)                           | 2.2 * | 2.0    | 1.78   | A | 213182_x_at | 1.3  | MISC |
| <i>NALP1</i>    | NM_021730 | NACHT, leucine rich repeat and PYD containing 1                            | 1.1   | 10.3 * | 9.86 * | A | 218380_at   | 7.0  | A    |
| <i>HMGB3</i>    | NM_005342 | high-mobility group box 3                                                  | 1.5   | 2.1 *  | 1.42   | A | 203744_at   | 0.9  | B    |
| <i>SOX2</i>     | AI669815  | SRY (sex determining region Y)-box 2                                       | 2.3   | 15.1 * | 10.4 * | B | 228038_at   | -    | -    |
| <i>BPY2</i>     | NM_004678 | basic charge, Y-linked, 2                                                  | 4.0 * | 1.8    | -2.2   | A | 208331_at   | 0.5  | B    |
| <i>BEX1</i>     | NM_018476 | brain expressed, X-linked 1                                                | -1.2  | 1.6    | 2.15 * | A | 218332_at   | 7.4  | A    |
| <i>LOC51337</i> | NM_016647 | mesenchymal stem cell protein DSCD75                                       | 1.1   | 2.1 *  | 1.75   | A | 218500_at   | 0.7  | B    |
| <i>KCTD12</i>   | AI718937  | potassium channel tetramerisation domain containing 12                     | 1.2   | 2.1 *  | 1.92 * | A | 212192_at   | 4.1  | MISC |
| <i>BTBD3</i>    | NM_014962 | BTB (POZ) domain containing 3                                              | 1.0   | 2.0 *  | 2 *    | A | 202946_s_at | 7.5  | A    |
| <i>STI8</i>     | NM_014682 | suppression of tumorigenicity 18 (breast carcinoma) (zinc finger protein)  | 1.4   | 7.9 *  | 4.94 * | A | 206135_at   | 11.4 | A    |
| <i>ZNF505</i>   | AC007204  | zinc finger protein 505                                                    | 2.9 * | 1.4    | -1.8   | A | 215758_x_at | 1.1  | B    |
| <i>RUNX1T1</i>  | NM_004349 | runt-related transcription factor 1; translocated to, 1 (cyclin D-related) | 1.3   | 3.0 *  | 2.17 * | A | 205529_s_at | 1.7  | MISC |
| <i>FEV</i>      | NM_017521 | FEV (ETS oncogene family)                                                  | -1.0  | 9.3 *  | 12.7 * | A | 207260_at   | 0.8  | B    |
| <i>KLF8</i>     | NM_007250 | Kruppel-like factor 8                                                      | 2.3 * | -1.6   | -2.1   | A | 219930_at   | 1.1  | MISC |
| <i>TBPL1</i>    | NM_004865 | TBP-like 1                                                                 | 1.4   | 1.8 *  | -1     | A | 208398_s_at | 0.8  | MISC |
| <i>HIC2</i>     | AK024950  | Hypermethylated in cancer 2                                                | -1.1  | 1.5    | 3.78 * | B | 233374_at   | -    | -    |
| <i>ETV1</i>     | BE881590  | ets variant gene 1                                                         | -1.5  | 1.6    | 2.2 *  | A | 221911_at   | 9.6  | A    |

#### RNA and protein turnover - Cellular response to stress

|                |           |                                                                    |       |       |        |   |             |     |      |
|----------------|-----------|--------------------------------------------------------------------|-------|-------|--------|---|-------------|-----|------|
| <i>EXOSC4</i>  | AI571298  | exosome component 4                                                | 7.0 * | 5.1 * | -1.4   | A | 91682_at    | 0.8 | MISC |
| <i>APOBEC2</i> | NM_006789 | apolipoprotein B mRNA editing enzyme, catalytic polypeptide-like 2 | 2.3 * | 1.6   | -1     | A | 206160_at   | 1.4 | MISC |
| <i>MIR</i>     | AA770170  | c-mir/membrane-associated ring finger (C3HC4) 8 (MARCH8)           | 1.2   | 2.0 * | 1.75   | A | 221824_s_at | 0.8 | MISC |
| <i>ERO1LB</i>  | AL045717  | endoplasmic oxidoreductin 1-like protein b                         | 1.8   | 2.9 * | 1.55   | B | 231944_at   | -   | -    |
| <i>PTBP2</i>   | NM_021190 | polypyrimidine tract binding protein 2                             | 1.7   | 2.4 * | 1.45   | A | 218683_at   | 0.7 | MISC |
| <i>USP18</i>   | NM_017414 | ubiquitin specific protease 18                                     | 2.3   | 7.8 * | 1.37   | A | 219211_at   | 0.8 | B    |
| <i>RCHY1</i>   | AV694093  | ring finger and CHY zinc finger domain containing 1                | -3.4  | 1.1   | 4.03 * | A | 212743_at   | 1.1 | MISC |
| <i>MSI2</i>    | BF435123  | musashi homolog 2 (Drosophila)                                     | 2.3 * | 1.1   | -1.3   | B | 225238_at   | -   | -    |
| <i>IBRDC2</i>  | BE274992  | IBR domain containing 2                                            | 1.0   | 3.6 * | 1.84   | B | 239704_at   | -   | -    |
| <i>DNAJC12</i> | AF176013  | DnaJ (Hsp40) homolog, subfamily C, member 12                       | 1.9   | 8.7 * | -1.3   | B | 223721_s_at | -   | -    |
| <i>CLGN</i>    | NM_004362 | calmegin                                                           | 1.0   | 2.7 * | 1.98   | A | 205830_at   | 4.2 | A    |
| <i>HSPA2</i>   | U56725    | heat shock 70kDa protein 2                                         | 1.7   | 2.2 * | 1.92 * | A | 211538_s_at | 1.1 | MISC |
| <i>GPX3</i>    | NM_002084 | glutathione peroxidase 3 (plasma)                                  | -1.3  | 1.1   | 1.81 * | A | 201348_at   | 1.3 | MISC |

|                                          |           |                                                                         |      |   |       |      |      |             |           |             |      |      |
|------------------------------------------|-----------|-------------------------------------------------------------------------|------|---|-------|------|------|-------------|-----------|-------------|------|------|
| <i>SKD3</i>                              | AI655698  | suppressor of potassium transport defect 3                              | 2.2  | * | 1.0   | -1.9 | A    | 221845_s_at | 0.8       | MISC        |      |      |
| <b>Metabolic Phenotype</b>               |           |                                                                         |      |   |       |      |      |             |           |             |      |      |
| <i>SLC6A3</i>                            | NM_001044 | solute carrier family 6 (neurotransmitter transporter, dopamine), membe | 1.0  |   | 2.2   | *    | 1.92 | A           | 206836_at | 0.9         | B    |      |
| <i>SLC18A1</i>                           | NM_003053 | solute carrier family 18 (vesicular monoamine), member 1                | 1.2  |   | 2.4   | *    | 2.54 | *           | A         | 207074_s_at | 0.7  | B    |
| <i>QPCT</i>                              | NM_012413 | glutaminy-peptide cyclotransferase (glutaminy cyclase)                  | 1.1  |   | 2.1   | *    | 2.04 | *           | A         | 205174_s_at | 28.0 | A    |
| <i>GCHI</i>                              | NM_000161 | GTP cyclohydrolase 1 (dopa-responsive dystonia)                         | 1.0  |   | 4.2   | *    | 3.36 | *           | A         | 204224_s_at | 20.3 | A    |
| <i>PGAP1</i>                             | AV705244  | GPI deacylase                                                           | 1.2  |   | 1.9   | *    | 1.54 |             | A         | 213469_at   | 4.4  | A    |
| <i>TPH1</i>                              | AI350339  | tryptophan hydroxylase 1 (tryptophan 5-monoxygenase)                    | 2.5  |   | 191.4 | *    | 43   | *           | A         | 214601_at   | 1.0  | B    |
| <i>GCK</i>                               | M69051    | glucokinase (hexokinase 4, maturity onset diabetes of the young 2)      | 1.4  |   | 1.9   |      | 1.94 | *           | A         | 211167_s_at | 1.7  | MISC |
| <i>UCP2</i>                              | U94592    | uncoupling protein 2 (mitochondrial, proton carrier)                    | 2.8  | * | 6.0   |      | 3.56 |             | A         | 208998_at   | 0.8  | MISC |
| <i>RBP4</i>                              | NM_006744 | retinol binding protein 4, plasma                                       | 1.0  |   | 1.8   |      | 2.78 | *           | A         | 219140_s_at | 48.0 | A    |
| <i>ATP2A3</i>                            | AF068220  | ATPase, Ca++ transporting, ubiquitous                                   | 5.7  | * | 2.3   |      | -2.3 |             | A         | 207521_s_at | 2.0  | A    |
| <i>BACH</i>                              | AL031848  | brain acyl-CoA hydrolase                                                | 2.0  | * | 1.1   |      | -2.1 |             | A         | 215728_s_at | 0.5  | B    |
| <i>SCD</i>                               | AB032261  | stearoyl-CoA desaturase (delta-9-desaturase)                            | -1.2 |   | 1.6   |      | 2.4  | *           | A         | 200832_s_at | 5.5  | C    |
| <i>OGDHL</i>                             | NM_018245 | oxoglutarate dehydrogenase-like                                         | -1.3 |   | -1.3  |      | 2.12 | *           | A         | 219277_s_at | 1.6  | C    |
| <i>LOC402295</i>                         | AC003989  | Similar to Argininosuccinate synthase (Citrulline--aspartate ligase)    | 4.0  | * | 2.1   |      | -1.4 |             | A         | 216564_at   | 0.7  | B    |
| <i>TCN2</i>                              | NM_000355 | transcobalamin II; macrocytic anemia                                    | 1.9  | * | 1.4   |      | -1.1 |             | A         | 204043_at   | 0.7  | B    |
| <i>ALOX5</i>                             | NM_000698 | arachidonate 5-lipoxygenase                                             | 1.4  |   | 2.3   | *    | -1.2 |             | A         | 204446_s_at | 5.2  | MISC |
| <i>ABCG1</i>                             | NM_004915 | ATP-binding cassette, sub-family G (WHITE), member 1                    | 1.0  |   | 1.1   |      | 2    | *           | A         | 204567_s_at | 2.2  | MISC |
| <i>SCARB1</i>                            | AF131830  | Scavenger receptor class B, member 1 = CD36 antigen - like1             | -1.5 |   | 1.2   |      | 2.23 | *           | B         | 233994_at   | -    | -    |
| <i>PDZK1</i>                             | NM_002614 | PDZ domain containing 1                                                 | 2.3  | * | 1.9   |      | 1.09 |             | A         | 205380_at   | 1.0  | MISC |
| <i>ELA3A</i>                             | D00306    | elastase 3A, pancreatic (protease E)                                    | 1.9  | * | -1.6  |      | -4.7 |             | A         | 210080_x_at | 2.1  | A    |
| <i>PGA5</i>                              | AI570199  | pepsinogen 5, group I (pepsinogen A)                                    | 10.6 | * | 5.4   |      | -1.8 |             | A         | 213265_at   | 2.7  | A    |
| <b>Structural - Extracellular Matrix</b> |           |                                                                         |      |   |       |      |      |             |           |             |      |      |
| <i>SPTBN4</i>                            | AF311856  | spectrin, beta, non-erythrocytic 4                                      | -1.6 |   | 1.1   |      | 2.36 | *           | B         | 224144_at   | -    | -    |
| <i>PCDHB10</i>                           | AF131761  | protocadherin beta 10                                                   | 10.0 |   | 3.6   | *    | 2.61 |             | B         | 223854_at   | -    | -    |
| <i>MCSP</i>                              | NM_030663 | mitochondrial capsule selenoprotein                                     | 2.1  | * | 1.8   |      | -1.4 |             | A         | 206406_at   | 1.1  | MISC |
| <i>NID</i>                               | BF940043  | nidogen (enactin)                                                       | 1.1  |   | 2.1   |      | 3.38 | *           | A         | 202007_at   | 0.9  | MISC |
| <i>CDH22</i>                             | AF035300  | cadherin-like 22                                                        | 2.6  | * | 1.3   |      | -1   |             | A         | 215181_at   | 1.1  | MISC |
| <i>CRYBA2</i>                            | NM_005209 | crystallin, beta A2                                                     | 1.0  |   | 12.1  | *    | 14.7 | *           | A         | 220136_s_at | 1.2  | B    |
| <i>KRT15</i>                             | NM_002275 | keratin 15                                                              | 2.7  |   | 24.0  | *    | -1.5 |             | A         | 204734_at   | 1.4  | MISC |
| <i>NYX</i>                               | Z93015    | nyctalopin                                                              | 45.1 | * | 17.8  |      | -3.2 |             | B         | 234496_x_at | -    | -    |
| <i>MUC16</i>                             | NM_024690 | mucin 16                                                                | 4.9  | * | 1.7   |      | -3   |             | A         | 220196_at   | 0.7  | B    |
| <i>KRTAP9-9</i>                          | NM_030975 | keratin associated protein 9-9                                          | 6.5  | * | 6.9   |      | 1.27 |             | A         | 220972_s_at | 0.6  | B    |
| <i>SFTPA2</i>                            | NM_006926 | surfactant, pulmonary-associated protein A2                             | 5.1  | * | 8.9   |      | 1.13 |             | A         | 218835_at   | 1.5  | MISC |
| <i>KRTAP4-10</i>                         | AJ406942  | keratin associated protein 4-10                                         | 3.1  | * | 2.2   |      | -1.6 |             | B         | 234635_at   | -    | -    |
| <i>KRTAP9-4</i>                          | AJ406948  | keratin associated protein 9-2 /// keratin associated protein 9-3       | 3.5  | * | 4.8   | *    | 1.41 |             | B         | 233640_x_at | -    | -    |
| <i>TRO</i>                               | AF349719  | trophinin                                                               | 1.1  |   | 1.4   |      | 2.35 | *           | A         | 211700_s_at | 0.8  | MISC |
| <b>Unassigned Function - EST</b>         |           |                                                                         |      |   |       |      |      |             |           |             |      |      |
| <i>KIAA1324</i>                          | AB037745  | mab1                                                                    | 1.7  |   | 3.0   | *    | 1.65 |             | A         | 221874_at   | 6.8  | A    |
| <i>TMEM28</i>                            | NM_015686 | transmembrane protein 28                                                | 2.1  | * | 3.1   |      | 1.26 |             | A         | 206299_at   | 0.8  | B    |
| <i>ARHGAP22</i>                          | NM_021226 | Rho GTPase activating protein 22                                        | 1.6  |   | 4.0   | *    | 2.17 |             | A         | 206298_at   | 0.7  | B    |

|                |           |                                                                         |      |      |      |      |      |             |             |           |      |   |
|----------------|-----------|-------------------------------------------------------------------------|------|------|------|------|------|-------------|-------------|-----------|------|---|
| <b>TCL6</b>    | AF195820  | T-cell leukemia/lymphoma 6                                              | 1.3  | 2.8  | 2.09 | *    | A    | 219840_s_at | 0.5         | B         |      |   |
| <b>CD99L2</b>  | AL136580  | CD99 antigen-like 2                                                     | 1.8  | 2.0  | *    | 1.17 | B    | 223041_at   | -           | -         |      |   |
| <b>SUSD2</b>   | AK026431  | sushi domain containing 2                                               | 87.4 | *    | 69.0 | *    | -1.3 | B           | 227480_at   | -         | -    |   |
| <b>RPESP</b>   | AW451999  | RPE-spondin                                                             | -1.0 | 1.1  | 2.4  | *    | B    | 230661_at   | -           | -         |      |   |
| <b>ECRG4</b>   | AF325503  | esophageal cancer related gene 4 protein                                | -1.2 | 2.1  | 2.84 | *    | B    | 223623_at   | -           | -         |      |   |
| <b>PLAC8</b>   | NM_016619 | placenta-specific 8                                                     | 1.3  | 2.8  | *    | 2.04 | *    | A           | 219014_at   | 1.8       | MISC |   |
| <b>MGC1136</b> | NM_024025 | dual specificity phosphatase 26 (putative)/hypothetical protein MGC1136 | -1.1 | 1.5  | 2.92 | *    | A    | 219144_at   | 1.1         | MISC      |      |   |
| <b>PCNXL2</b>  | NM_024938 | pecanex-like 2 (Drosophila) (hypothetical protein FLJ11383)             | 5.7  | *    | 4.1  | -2.3 | A    | 220461_at   | 0.4         | B         |      |   |
| <b>SDADI</b>   | AA768015  | SDA1 domain containing 1                                                | -5.3 | 1.0  | 7.6  | *    | B    | 242190_at   | -           | -         |      |   |
| <b>SIPAIL1</b> | AB007900  | Signal-induced proliferation-associated 1 like 1                        | -1.0 | 1.2  | 1.82 | *    | A    | 202254_at   | 1.1         | C         |      |   |
| -              | AW188087  | CDNA FLJ30428 fis, clone BRACE2008941                                   | 1.3  | 2.3  | *    | 1.65 | B    | 226809_at   | -           | -         |      |   |
| -              | AV723984  | CDNA FLJ45905 fis, clone OCBBF3026576                                   | 1.4  | 2.3  | *    | 1.92 | B    | 230403_at   | -           | -         |      |   |
| -              | N30138    | chromosome 14 open reading frame 31                                     | 2.0  | *    | 1.5  | -1.6 | B    | 225464_at   | -           | -         |      |   |
| -              | AB058892  | chromosome 19 open reading frame 30                                     | 1.0  | 4.0  | *    | 4.75 | *    | B           | 223913_s_at | -         | -    |   |
| -              | AW452080  | chromosome 9 open reading frame 47                                      | 1.1  | -1.2 | 2.31 | *    | B    | 231286_at   | -           | -         |      |   |
| -              | AF131798  | Clone 25119 mRNA sequence                                               | 1.4  | 3.4  | *    | 2.25 | B    | 233310_at   | -           | -         |      |   |
| -              | AL080072  | DKFZp564M0616 (from clone DKFZp564M0616)                                | 2.2  | *    | -1.9 | 2.84 | A    | 215763_at   | -           | -         |      |   |
| -              | AA682853  | EST                                                                     | 3.6  | *    | 1.9  | -1.6 | B    | 243950_at   | -           | -         |      |   |
| -              | AA825243  | EST                                                                     | 3.7  | *    | 1.4  | -1.8 | B    | 243950_at   | -           | -         |      |   |
| -              | AI912225  | EST                                                                     | 4.8  | *    | 1.7  | -1.9 | B    | 243950_at   | -           | -         |      |   |
| -              | AI963605  | EST                                                                     | 3.6  | *    | 1.5  | -1.1 | B    | 243950_at   | -           | -         |      |   |
| -              | AL040051  | EST                                                                     | 2.4  | *    | 1.6  | -1.9 | B    | 243950_at   | -           | -         |      |   |
| -              | AV685992  | EST                                                                     | -1.1 | 2.0  | 2.45 | *    | B    | 243950_at   | -           | -         |      |   |
| -              | AW590038  | EST                                                                     | 2.5  | *    | 1.3  | -1.7 | B    | 243950_at   | -           | -         |      |   |
| -              | AK026856  | FLJ23203 fis, clone ADKA02487                                           | -1.1 | 2.0  | 3.31 | *    | A    | 216794_at   | 0.9         | MISC      |      |   |
| -              | BC001200  | hypothetical protein BC009862                                           | 1.4  | 2.9  | *    | 1.99 | B    | 232642_at   | -           | -         |      |   |
| -              | NM_019018 | hypothetical protein FLJ11127                                           | 1.5  | 2.8  | *    | 1.85 | A    | 219694_at   | 2.3         | A         |      |   |
| -              | BF002149  | hypothetical protein FLJ20245                                           | 6.4  | *    | 2.5  | -1.9 | B    | 229708_at   | -           | -         |      |   |
| -              | AU150619  | hypothetical protein LOC149351                                          | -1.0 | 1.1  | 4.27 | *    | B    | 232450_at   | -           | -         |      |   |
| -              | AI766925  | hypothetical protein LOC199964                                          | 3.4  | *    | 2.1  | -1   | B    | 230822_at   | -           | -         |      |   |
| -              | AA600175  | hypothetical protein LOC253012                                          | 8.0  | *    | 34.5 | *    | 7.55 | *           | B           | 242601_at | -    | - |
| -              | BG396614  | hypothetical protein LOC283683                                          | 2.0  | 2.9  | *    | 1.49 | A    | 217520_x_at | 1.3         | MISC      |      |   |
| -              | AU151211  | hypothetical protein LOC284723                                          | 12.6 | *    | 27.0 | *    | 1.64 | B           | 232245_at   | -         | -    |   |
| -              | BF038366  | hypothetical protein MAC30                                              | -1.1 | 2.2  | *    | 1.47 | A    | 212281_s_at | 1.2         | A         |      |   |
| -              | AA708152  | hypothetical protein MGC23911                                           | 2.9  | *    | 1.9  | -2   | B    | 236430_at   | -           | -         |      |   |
| -              | AV762108  | hypothetical protein MGC2477                                            | 1.2  | 2.5  | *    | 2.39 | *    | B           | 238680_at   | -         | -    |   |
| -              | AB051499  | KIAA1712                                                                | 1.4  | 2.2  | *    | 1.41 | B    | 231850_x_at | -           | -         |      |   |
| -              | AI350500  | similar to hypothetical protein MGC13138                                | 3.3  | *    | 1.6  | -1.8 | A    | 213529_at   | 0.9         | MISC      |      |   |
| -              | AI377780  | Similar to hypothetical protein MGC39725                                | -1.6 | 1.3  | 3.36 | *    | B    | 231525_at   | -           | -         |      |   |
