# Supplementary material for: Plasticity of Adult Human Pancreatic Duct Cells by Neurogenin3-Mediated Reprogramming
Source: PubMed Central journal article supplement (PMC3351393; doi:10.1371/journal.pone.0037055), 2012-05-14
Supplement: pone.0037055.s004.pdf [file pone.0037055.s004.pdf]

**Table S2: Gene expression suppressed by Ad-GFP-ngn3 in human pancreatic duct cells**

| Gene Symbol                                          | Accession | Gene name                                                                                        | Ngn3/Control |         | Ngn3<br>D14/D3 | ARRAY<br>HG133 | Probe set<br>ID |
|------------------------------------------------------|-----------|--------------------------------------------------------------------------------------------------|--------------|---------|----------------|----------------|-----------------|
|                                                      |           |                                                                                                  | D3           | D14     |                |                |                 |
| <b>Pancreatic Non-Endocrine</b>                      |           |                                                                                                  |              |         |                |                |                 |
| <i>CTRB1</i>                                         | NM_001906 | chymotrypsinogen B1                                                                              | 1.0          | -2.3    | -4.1 *         | A              | 205971_s_at     |
| <i>ELA3A</i>                                         | BC005918  | elastase 3A, pancreatic (protease E)                                                             | 1.8          | -1.6    | -4.6 *         | A              | 211738_x_at     |
| <i>ELA3B</i>                                         | NM_007352 | elastase 3B                                                                                      | 1.9          | -1.7    | -6.9 *         | A              | 206151_x_at     |
| <i>KLK12</i>                                         | AF135025  | kallikrein 12                                                                                    | 1.1          | -1.3    | -4.5 *         | B              | 234316_x_at     |
| <i>MPI</i>                                           | NM_002421 | matrix metalloproteinase 1 (interstitial collagenase)                                            | -1.9 *       | 1.0     | -1.2           | A              | 204475_at       |
| <i>PRSS2</i>                                         | NM_002770 | protease, serine, 2 (trypsin 2)                                                                  | 1.0          | -2.0    | -3.8 *         | A              | 205402_x_at     |
| <i>REG1A</i>                                         | AF172331  | regenerating islet-derived 1 alpha                                                               | -1.1         | -1.8    | -1.9 *         | A              | 209752_at       |
| <i>REG1B</i>                                         | NM_006507 | regenerating islet-derived 1 beta                                                                | -1.1         | -2.3    | -3.0 *         | A              | 205886_at       |
| <i>REG3A</i>                                         | NM_002580 | regenerating islet-derived 3 alpha (pancreatitis-associated protein)                             | -1.0         | -3.0    | -4.4 *         | A              | 205815_at       |
| <i>REGL</i>                                          | NM_006508 | regenerating islet-derived-like, pancreatic stone protein-like                                   | -1.1         | -2.3 *  | -4.4 *         | A              | 207778_at       |
| <i>RNASE1</i>                                        | NM_002933 | ribonuclease, RNase A family, 1 (pancreatic)                                                     | -1.2         | -1.8    | -2.6 *         | A              | 201785_at       |
| <i>SPINK1</i>                                        | NM_003122 | serine protease inhibitor, Kazal type 1                                                          | -1.0         | -1.6    | -1.8 *         | A              | 206239_s_at     |
| <i>PRSS3</i>                                         | U66061    | protease, serine, 3 (mesotrypsin)                                                                | -1.1         | -2.4    | -4.2 *         | A              | 215395_x_at     |
| <i>ALB</i>                                           | X57348    | albumin                                                                                          | -1.2         | -4.2 *  | -3.8           | A              | 211298_s_at     |
| <b>Metabolic Phenotype</b>                           |           |                                                                                                  |              |         |                |                |                 |
| <i>NQO1</i>                                          | AI039874  | NAD(P)H dehydrogenase, quinone 1                                                                 | -2.0 *       | -1.4    | 1.1            | A              | 201467_s_at     |
| <i>CYP2C8</i>                                        | NM_030878 | cytochrome P450, family 2, subfamily C, polypeptide 8                                            | -1.9         | -3.1 *  | 1.2            | A              | 208147_s_at     |
| <i>APOL2</i>                                         | NM_030882 | apolipoprotein L, 2                                                                              | -1.8         | -2.9 *  | 1.0            | A              | 221013_s_at     |
| <i>AKR1B10</i>                                       | NM_020299 | aldo-keto reductase family 1, member B10 (aldose reductase)                                      | -2.2 *       | -1.0    | 1.2            | A              | 206561_s_at     |
| <i>FABP5</i>                                         | NM_001444 | fatty acid binding protein 5 (psoriasis-associated)                                              | -2.0 *       | 1.6     | 1.5            | A              | 202345_s_at     |
| <i>CSE-C</i>                                         | AF300796  | cytosolic sialic acid 9-O-acetyltransferase homolog                                              | -394.3 *     | 1.0     | 1.0            | B              | 223744_s_at     |
| <i>PPGB</i>                                          | NM_000308 | protective protein for beta-galactosidase (galactosialidosis)                                    | -1.3         | -1.9 *  | 1.0            | A              | 200661_at       |
| <i>ATP2B3</i>                                        | AW615612  | ATPase, Ca <sup>++</sup> transporting, plasma membrane 3                                         | -424.5 *     | -1.5    | 660.1          | A              | 215911_x_at     |
| <b>Development - Transcription - DNA interacting</b> |           |                                                                                                  |              |         |                |                |                 |
| <i>S100P</i>                                         | NM_005980 | S100 calcium binding protein P                                                                   | -1.9         | -2.8 *  | -1.1           | A              | 204351_at       |
| <i>HOXD9</i>                                         | NM_014213 | homeo box D9 (HOXD9)                                                                             | -4.1 *       | -2.6    | -2.9           | A              | 205605_at       |
| <i>PLXNA1</i>                                        | AL162013  | plexin A1                                                                                        | -1.6         | -3.2 *  | -1.5           | A              | 214781_at       |
| <i>PX19</i>                                          | AF112203  | px19-like protein                                                                                | 1.2          | 1.1     | -2.1 *         | B              | 224232_s_at     |
| <i>OTX1</i>                                          | AI813505  | orthodenticle homolog 1 (Drosophila)                                                             | -2.7         | -95.2 * | -70.6          | B              | 238839_at       |
| <i>ATF3</i>                                          | NM_001674 | activating transcription factor 3                                                                | -1.2         | -1.4    | -2.0 *         | A              | 202672_s_at     |
| <i>WBSCR20B</i>                                      | AI768378  | Williams-Beuren Syndrome critical region protein 20 copy B                                       | -2.3 *       | -2.1 *  | 1.3            | A              | 213670_x_at     |
| <i>SFN</i>                                           | X57348    | stratifin                                                                                        | -2.1 *       | -1.7    | -1.2           | A              | 33323_r_at      |
| <i>NOL6</i>                                          | AK026258  | nucleolar protein family 6 (RNA-associated)                                                      | -2.6 *       | -1.4    | -1.6           | B              | 232566_at       |
| <i>BRF1</i>                                          | N91109    | BRF1 homolog, subunit of RNA polymerase III transcription initiation factor IIIB (S. cerevisiae) | -2.9         | -3.9 *  | -3.4 *         | A              | 215677_s_at     |
| <i>PRDM9</i>                                         | NM_020227 | PR domain containing 9                                                                           | -1.1         | -2.4 *  | -4.3 *         | A              | 221151_at       |
| <i>CHRAC1</i>                                        | AK023537  | chromatin accessibility complex 1                                                                | -1.0         | -1.4    | -3.4 *         | B              | 231764_at       |
| <i>MYC</i>                                           | NM_002467 | v-myc myelocytomatosis viral oncogene homolog (avian)                                            | -1.8 *       | -1.2    | -1.5           | A              | 202431_s_at     |
| <b>Signaling</b>                                     |           |                                                                                                  |              |         |                |                |                 |
| <i>PTN</i>                                           | NM_002838 | protein tyrosine phosphatase, receptor type, C                                                   | -2.3 *       | -4.9    | -6.2           | A              | 207238_s_at     |
| <i>FGFR2</i>                                         | AB030075  | fibroblast growth factor receptor 2                                                              | -2.3 *       | -2.6    | -1.7           | A              | 211398_at       |
| <i>MAP3K5</i>                                        | NM_005923 | mitogen-activated protein kinase kinase kinase 5                                                 | 1.2          | -1.1    | -2.1 *         | A              | 203837_at       |
| <i>DUSP4</i>                                         | BC002671  | dual specificity phosphatase 4                                                                   | -1.0         | -1.3    | -2.3 *         | A              | 204015_s_at     |
| <i>EDG6</i>                                          | NM_003775 | endothelial differentiation, G-protein-coupled receptor 6                                        | -2.3         | -3.2 *  | 1.0            | A              | 206437_at       |

|                                            |           |                                                                                   |        |      |        |       |   |             |             |
|--------------------------------------------|-----------|-----------------------------------------------------------------------------------|--------|------|--------|-------|---|-------------|-------------|
| <i>PTGER1</i>                              | AI480353  | prostaglandin E receptor 1 (subtype EP1), 42kD                                    | 1.0    | -1.1 | -3.6   | *     | B | 231201_at   |             |
| <b>Immological</b>                         |           |                                                                                   |        |      |        |       |   |             |             |
| <i>IGLC2</i>                               | H53689    | Immunoglobulin lambda variable 3-21                                               | -212.8 | *    | -110.9 | 1.0   | A | 215214_at   |             |
| <i>TSCOT</i>                               | AF242557  | thymic stromal co-transporter                                                     | -2.5   |      | -63.1  | *     | B | 223816_at   |             |
| <i>NCF1</i>                                | AW072388  | neutrophil cytosolic factor 1 (47kDa, chronic granulomatous disease, autosomal 1) | 1.2    |      | 2.3    | -8.9  | * | A           | 214084_x_at |
| <b>Response to stress-Protein turnover</b> |           |                                                                                   |        |      |        |       |   |             |             |
| <i>HSPA6</i>                               | NM_002155 | heat shock 70kDa protein 6 (HSP70B')                                              | -1.2   |      | -1.4   | -2.1  | * | A           | 213418_at   |
| <i>SQSTM1</i>                              | N30649    | sequestosome 1                                                                    | -2.1   | *    | -1.9   | -2.0  | A | 213112_s_at |             |
| <i>MDN1</i>                                | AL096678  | MDN1, midasin homolog (yeast)                                                     | -2.6   | *    | -1.1   | 2.1   | B | 234854_at   |             |
| <i>CFLAR</i>                               | AA971429  | CASP8 and FADD-like apoptosis regulator                                           | -2.9   | *    | -3.5   | -3.5  | B | 237367_x_at |             |
| <b>Structural</b>                          |           |                                                                                   |        |      |        |       |   |             |             |
| <i>MUC1</i>                                | AI610869  | mucin 1, transmembrane                                                            | -1.7   | *    | -1.7   | -1.5  | A | 213693_s_at |             |
| <i>KLHL1</i>                               | AF126749  | kelch-like 1 (Drosophila)                                                         | -3.3   | *    | -2.4   | -1.9  | A | 216391_s_at |             |
| <i>BLOC1S3</i>                             | BF434644  | Biogenesis of lysosome-related organelles complex-1, subunit 3 (elastin family)   | -1.3   |      | -2.4   | *     | B | 230576_at   |             |
| <i>KATNB1</i>                              | AI659998  | katanin p80 (WD40-containing) subunit B 1                                         | -4.1   | *    | -7.4   | -8.8  | B | 229077_at   |             |
| <i>UPK1B</i>                               | NM_006952 | uroplakin 1B (tetraspanin family)                                                 | -1.7   |      | -1.8   | *     | A | 210064_s_at |             |
| <b>Unknown Function - EST</b>              |           |                                                                                   |        |      |        |       |   |             |             |
| <i>RARRES2</i>                             | BC000069  | retinoic acid receptor responder (tazarotene induced) 2                           | -1.1   |      | -1.5   | -2.2  | * | A           | 209496_at   |
| <i>CDRT1</i>                               | U43383    | CMT1A duplicated region transcript 1                                              | -2.6   |      | -10.2  | *     | A | 215999_at   |             |
| <i>LOC388503</i>                           | AV700829  | complement C3 protein (GPC3) precursor-like                                       | -64.1  | *    | -4.6   | 10.7  | B | 231691_at   |             |
| <i>SDBCAG84</i>                            | AF308298  | serologically defined breast cancer antigen 84                                    | -6.3   | *    | 2.4    | 2.7   | A | 215257_at   |             |
| <i>LOC201140</i>                           | AI741629  | Similar to DKFZP566O084 protein                                                   | -1.8   |      | -3.3   | *     | B | 230915_at   |             |
| <i>C14orf151</i>                           | BC006173  | chromosome 14 open reading frame 151 /// chromosome 14 open reading frame 151     | 1.4    |      | 1.4    | -2.4  | * | B           | 224469_s_at |
| -                                          | U82695    | CDNA FLJ25090 fis, clone CBL08887                                                 | -1.0   |      | -1.0   | -3.8  | * | B           | 233116_at   |
| -                                          | NM_020356 | chromosome 20 open reading frame 32                                               | 2.0    |      | -5.2   | *     | A | 220888_s_at |             |
| -                                          | BC003550  | chromosome 7 open reading frame 20                                                | 1.1    |      | -1.1   | -1.9  | * | B           | 223811_s_at |
| -                                          | BF339357  | chromosome 9 open reading frame 9                                                 | -2.7   | *    | -2.0   | -2.2  | B | 239222_at   |             |
| -                                          | AA601997  | EST                                                                               | -2.9   | *    | -1.2   | -1.5  | B | 237154_at   |             |
| -                                          | AI002125  | EST                                                                               | 1.5    |      | -42.0  | *     | B | 241204_at   |             |
| -                                          | AI040777  | EST                                                                               | -1.5   |      | -2.4   | *     | B | 241334_at   |             |
| -                                          | AI492953  | EST                                                                               | -3.2   | *    | -8.0   | -7.8  | B | 239696_at   |             |
| -                                          | AI827936  | EST                                                                               | -3.1   | *    | -17.0  | -44.1 | B | 243925_at   |             |
| -                                          | AI973099  | EST                                                                               | -704.0 | *    | 1.0    | 1.0   | B | 242264_at   |             |
| -                                          | AL040051  | EST                                                                               | 2.4    |      | 1.6    | -1.9  | * | B           | 225481_at   |
| -                                          | AL537303  | EST                                                                               | -1.0   |      | -1.5   | -2.6  | * | B           | 230600_at   |
| -                                          | AW977708  | EST                                                                               | -2.4   | *    | -1.4   | -1.2  | B | 238899_at   |             |
| -                                          | BE465909  | EST                                                                               | -2.2   | *    | -1.3   | -1.1  | B | 239662_x_at |             |
| -                                          | BE645588  | EST                                                                               | -2.8   | *    | -1.3   | 1.1   | B | 243429_at   |             |
| -                                          | BF055302  | EST                                                                               | -1.2   |      | -1.3   | -2.7  | * | B           | 237547_at   |
| -                                          | BF512216  | EST                                                                               | -2.8   | *    | -1.1   | -1.2  | B | 230111_at   |             |
| -                                          | Y12839    | hypothetical protein BC014602                                                     | -2.3   | *    | -2.1   | -1.8  | B | 234498_at   |             |
| -                                          | NM_018331 | hypothetical protein FLJ11125                                                     | -2.3   | *    | -1.7   | -1.6  | A | 219776_s_at |             |
| -                                          | AU157605  | hypothetical protein FLJ11236                                                     | -2.3   | *    | -1.3   | -1.6  | B | 228433_at   |             |
| -                                          | NM_024765 | hypothetical protein FLJ12649                                                     | -1.9   | *    | -1.6   | -1.4  | A | 219576_at   |             |
| -                                          | AA007367  | hypothetical protein FLJ32356                                                     | 1.2    |      | 1.1    | -2.6  | * | B           | 229690_at   |
| -                                          | AL137364  | hypothetical protein MGC24039                                                     | -2.1   | *    | 1.3    | 1.0   | B | 228551_at   |             |
| -                                          | NM_018614 | hypothetical protein PRO2012                                                      | -1.1   |      | 1.0    | -64.4 | * | A           | 220883_at   |
