# Supplementary material for: Plasticity of Adult Human Pancreatic Duct Cells by Neurogenin3-Mediated Reprogramming
Source: PubMed Central journal article supplement (PMC3351393; doi:10.1371/journal.pone.0037055), 2012-05-14
Supplement: pone.0037055.s005.pdf [file pone.0037055.s005.pdf]

**A.**

| Template | Forward (5'-3')      | Reverse (5'-3')      | cDNA PCR product (bp) |
|----------|----------------------|----------------------|-----------------------|
| Gapdh    | ACCACAGTCCATGCCATCAC | TCCACCACCCTGTTGCTGTA | 452                   |
| GFP      | GTCCAGGAGCGCACCATCT  | GTTCTTCTGCTTGTCGGCCA | 200                   |
| HA-Ngn3  | GCTACCCATACGATGTTCCA | CAGTCACCCACTTCTGCTTC | 193                   |
| hsNgn3   | CCACGGCCCTCGCTGCTC   | GCGGACGTGGGGCAGGTC   | 155                   |
| NeuroD1  | AGGCCCCAGGGTTATGAGAC | TGAGTCCTCCTCTGCGTTCA | 218                   |
| Nkx2.2   | GCACCGAGGGCCTTCAGTA  | CCGGGGTCTCCTTGTCATT  | 123                   |
| Pax4     | CGGCTAGCAGTCAGTGAAT  | GCAGGACTCGGTTGATGGA  | 292                   |
| Pcp4     | CAACCAATGGAAGACA     | CCAGCCTTCTTCTTCTG    | 151                   |
| Pcsk1    | GGGTGGAGAAGATGGTGGAT | CGCAGGGTAAGGAAGAAGCA | 460                   |
| Rab26    | CAGGAAGAAGACCCCAAGA  | TTGTTCCGGAAGTCAATGC  | 307                   |
| Scg3     | CAACCCAGGAGGAAAGACAG | CCTCGGCTTCTTCCTTGT   | 203                   |
| Scgn     | CAGAAGTGGATGGGTTTGTC | GTTGATTTTCAGCCCAAGAC | 167                   |
| Sim1     | AGAAGCCTATGAAAACAGCA | CATTAATGGAAGCCAGTTG  | 272                   |

**B.**

| Template | Assay ID      |
|----------|---------------|
| Dll1     | Hs00194509_m1 |
| Gcg      | Hs00174967_m1 |
| Gck      | Hs00277220_m1 |
| Hes1     | Hs00172878_m1 |
| Ins      | Hs00355773_m1 |
| Insm1    | Hs00357871_s1 |
| MafA     | Hs01651425_s1 |
| NeuroD1  | Hs00159598_m1 |
| Nkx2.2   | Hs00159616_m1 |
| Pax4     | Hs00173014_m1 |
| Ppia     | Hs99999904_m1 |
| Syp      | Hs00300531_m1 |

**C.**

| Template | Forward (5'-3')          | Reverse (5'-3')         | genomic PCR product (bp) |
|----------|--------------------------|-------------------------|--------------------------|
| Ngn3     | TGGCCCGGGCGAAGCAGATA     | GCCCCAGCCCCAAAGGAGAAAA  | 117                      |
| NeuroD1  | CCCTCTATCCCCGTCCCTTCTG   | CCACGTGACCTGCCCATTTGTA  | 162                      |
| BRCA-1   | GAGTCCTAGCCCTTTCACCCATAC | GTGATGTTTCTGAGATGCCTTTG | 288                      |
| CTLA-4   | ACAAGGCTCAGCTGAACCTGGGT  | CTGCCGCCCAACTGCTCC      | 259                      |
